# Supplementary material for: Getting ready for host invasion: elevated expression and action of xyloglucan endotransglucosylases/hydrolases in developing haustoria of the holoparasitic angiosperm Cuscuta
Source: PubMed Central journal article supplement (PMC4737069; doi:10.1093/jxb/erv482), 2015-11-11
Supplement: supp_erv482_Supplementary_Tables_S1_Figures_S1_S5.pdf [file supp_erv482_Supplementary_Tables_S1_Figures_S1_S5.pdf]

## Supplementary data for

### “Getting ready for host invasion: elevated expression and action of xyloglucan endotransglucosylases/hydrolases in developing haustoria of the holoparasitic angiosperm *Cuscuta*”

Stian Olsen, Bernd Striberny, Julien Hollmann, Rainer Schwacke, Zoë Popper and Kirsten Krause

Supplementary Table S1. Sequences of gene-specific primers with respective amplicon sizes and PCR efficiencies.

| Gene            | Forward primer (5'→3')   | Reverse primer (5'→3') | Amplicon size | Efficiency | R <sup>2</sup> |
|-----------------|--------------------------|------------------------|---------------|------------|----------------|
| <i>Cr-ACTIN</i> | ATGGAAGCTGCTGGAATCCAC    | TTGCTCATACGGTCAGCGATG  | 140 bp        | 96.3 %     | 0.999          |
| <i>Cr-SF2</i>   | CGAGGATTTGTTTTACAAGTATGG | CGACCACGAATAGCGTCTTCC  | 126 bp        | 102.3 %    | 0.998          |
| <i>Cr-GH1</i>   | TGGTATGGGGTATGCCTCTC     | AACCAGCCAAACACGAAATC   | 82 bp         | 105.7 %    | 0.991          |
| <i>Cr-GH31</i>  | TCGGTCCACGACCTTTTAC      | TTGCAGTCCAAACAGCAGAC   | 147 bp        | 105.9 %    | 0.996          |
| <i>Cr-GH17</i>  | CAAGTCTTTTGTCCCACCAA     | CGAACACCCTTTTCCACTACA  | 144 bp        | 99.6 %     | 0.990          |
| <i>Cr-XTH-1</i> | CACTTCCAACACTGGGTCCT     | AATCCGCCCAAAGAGGTA     | 226 bp        | 90.0 %     | 0.992          |
| <i>Cr-XTH-2</i> | ATAGTCATGGAAGCCGGTTG     | GCTTGTGGGAGGAGACTCTG   | 208 bp        | 102.4 %    | 0.998          |
| <i>Cr-PAE</i>   | TGTTTAGCCGATGCTGGTTAC    | AGCCTTACACGAAGCAGACAA  | 129 bp        | 107.8 %    | 0.997          |
| <i>Cr-RGP</i>   | CCAACGAAAATCATCCGAGT     | GTTCTTGATGTGCTGCTCCA   | 237 bp        | 103.0 %    | 0.999          |
| <i>Cr-PX-1</i>  | TTGGCCTCGGAGTTAATGAC     | GGATCCACGTTTGTCTCGTT   | 109 bp        | 102.3 %    | 1.000          |
| <i>Cr-PX-2</i>  | ACCCACCAATGTGACCATT      | CTTGGGAGAGGAGATGCAAG   | 141 bp        | 100.7 %    | 0.999          |
| <i>Cr-PX-3</i>  | CCACCCGTGACGTTATCTCT     | TGGAAGGATGGCTTTGGTAG   | 121 bp        | 102.9 %    | 0.996          |
| <i>Cr-GH5</i>   | AATAACCACGGATGGTTGGA     | GCTGATGCTGTGCTTGGTTA   | 137 bp        | 95.6 %     | 0.993          |
| <i>Cr-GT20</i>  | CACCGAAGCAGACCAATACAT    | CCGAGATTATACCCGGAACAT  | 241 bp        | 103.7 %    | 0.995          |
| <i>Cg-ACTIN</i> | CCCATACCAACCATCACTCC     | TGAGGATATTCAGCCCTTG    | 138 bp        | 105.1 %    | 0.996          |
| <i>Cg-SF2</i>   | ACATCGTCTCTCAGGGAAA      | CATCAGCATCACGAGCATCT   | 205 bp        | 108.9 %    | 0.988          |
| <i>Cg-XTH-1</i> | AGATGATGTGTTGGGGCTTC     | TGGTGAAGCCATACACTCTGC  | 137 bp        | 95.0 %     | 0.987          |
| <i>Cg-XTH-2</i> | TAAGGCCAGATACCCACAG      | AAACATGAGCCCAATTCCAC   | 133 bp        | 102.4 %    | 0.997          |

Supplementary Tables S2 and S3 are presented in a separate Excel file.

Supplementary Figure S1

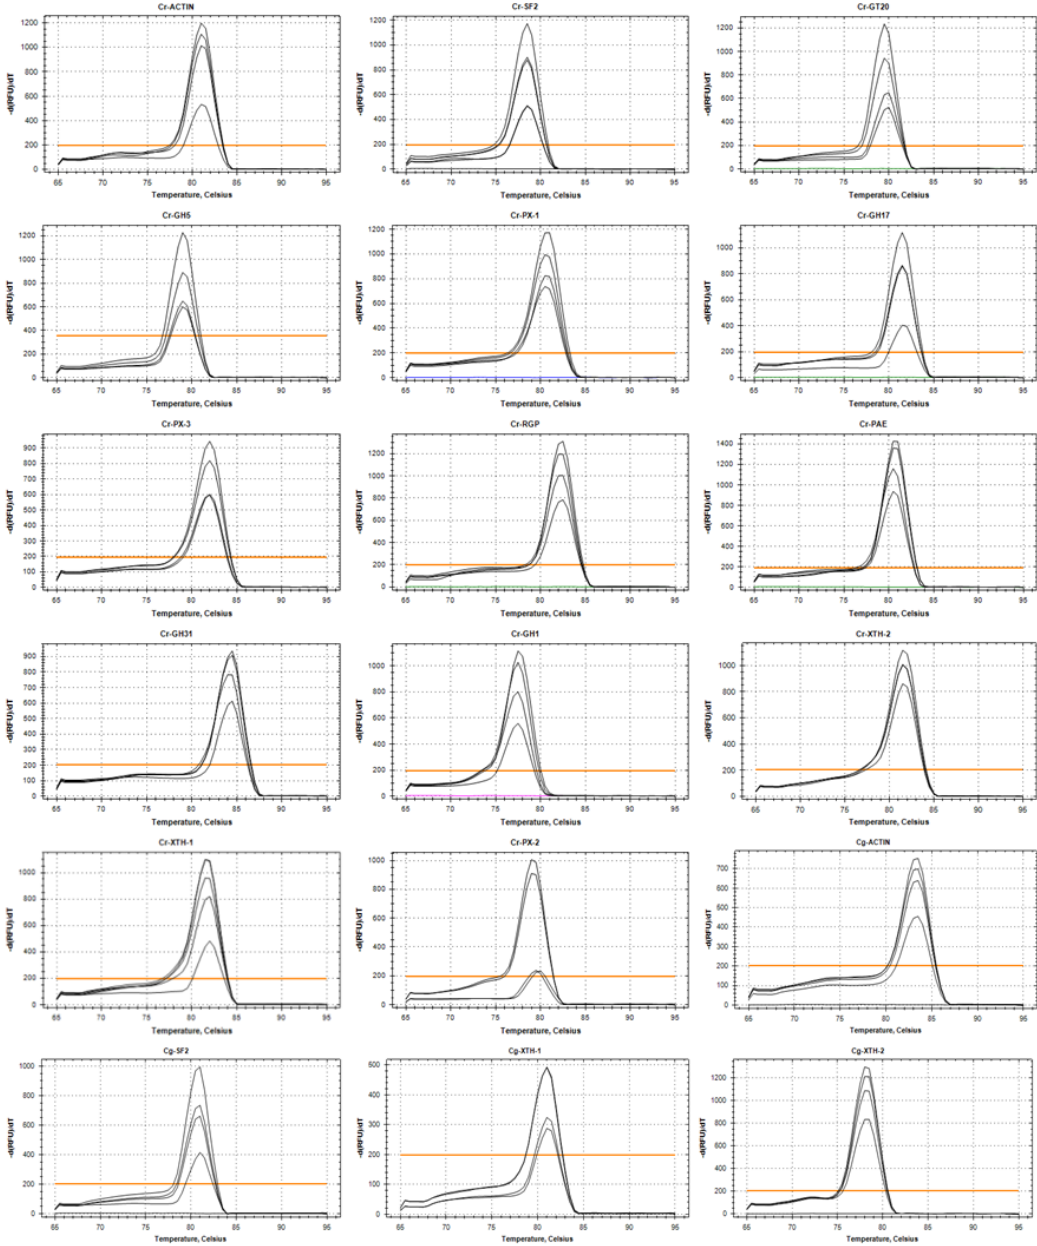

Suppl. Fig. S1. Melt peaks of qPCR amplicons. The negative derivative of the change in fluorescence intensity is plotted as a function of temperature.

## Supplementary Figure S2

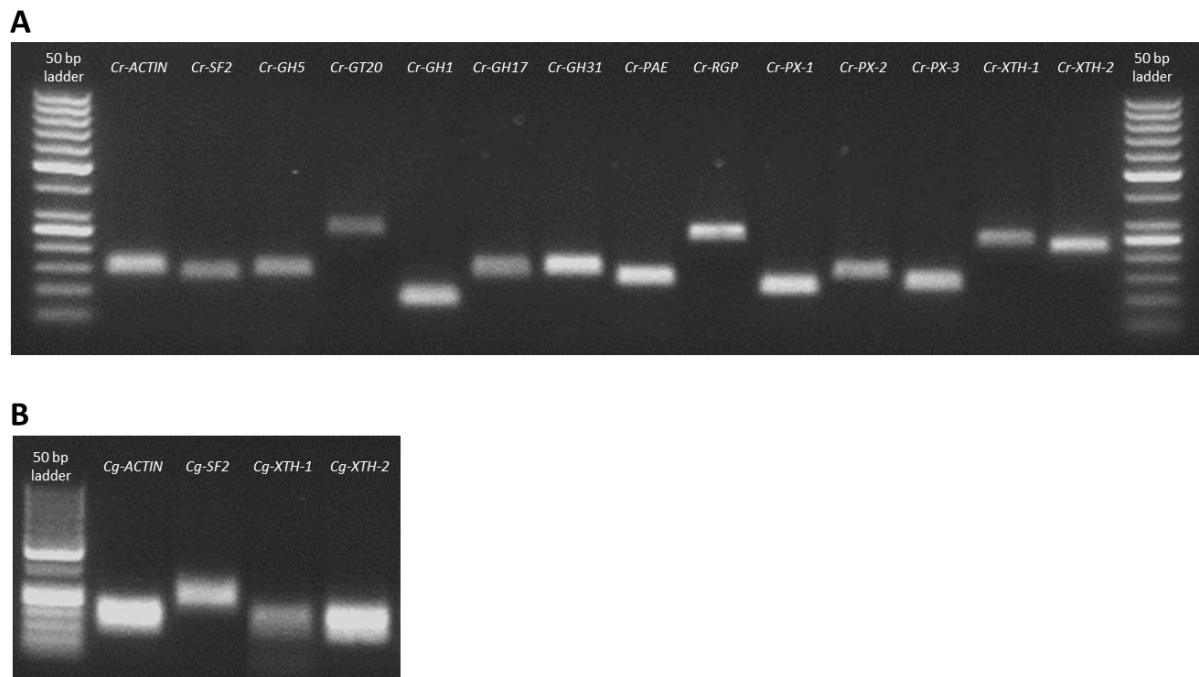

Suppl. Fig. S2. Size separation of (A) *C. reflexa* and (B) *C. gronovii* qPCR amplicons on 2 % agarose gels. GeneRuler 50 bp Ladder (Life Technologies) is used for size estimation.

## Supplementary Figure S3

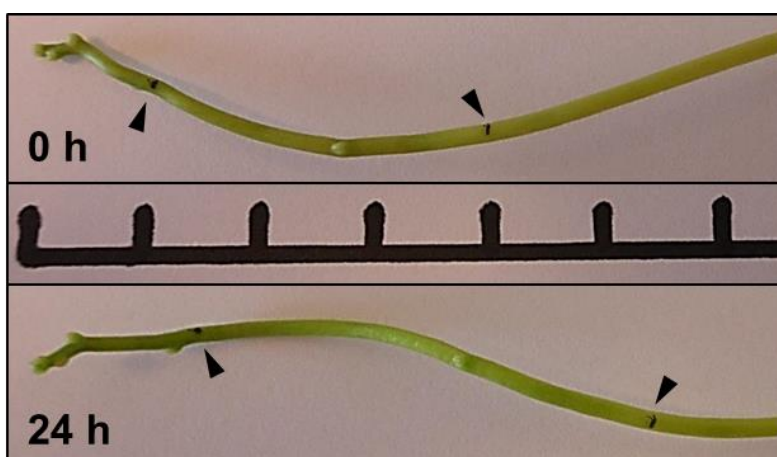

Suppl. Fig. S3. Stem elongation occurring in the region just below the apical shoot tip as indicated by increased distance between markings (arrowheads) after 24 hours. Distances between ruler marks are one cm.

### Supplementary Figure S4

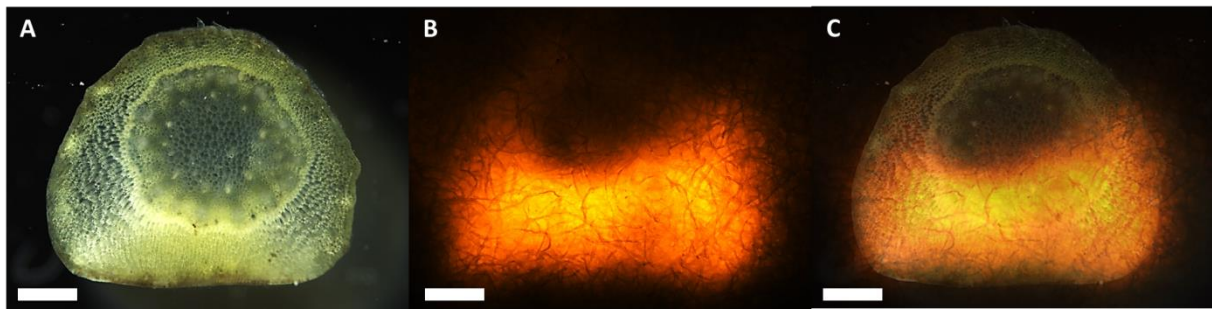

Suppl. Fig. S4. XET action in FR light-induced haustoria. (A) Cross-section of haustorium that was tissue printed on XET test paper three days after light treatment. (B) Fluorescence micrograph showing XET action in the printed tissue in A. (C) Merged picture of A-B. Scale bars are 500  $\mu\text{m}$ . Note that the vein pattern in B and C comes from the fibres in the test paper.

### Supplementary Figure S5

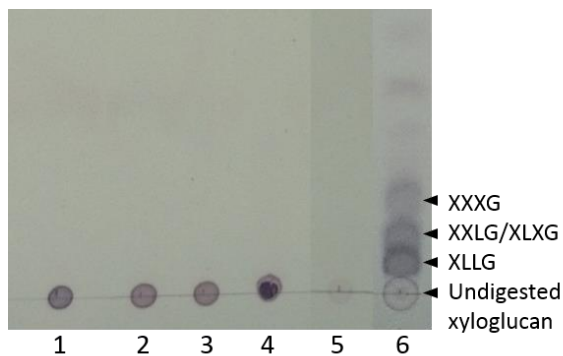

Suppl. Fig. S5. Hydrolytic activity of a haustorial enzyme extract from *C. reflexa* towards xyloglucan. Enzymes were extracted from *C. reflexa* haustoria by homogenizing plant material in extraction buffer (50 mM Na-acetate pH 5.5, 300 mM NaCl, 10 % glycerol, 10 % PVP40) and incubating on ice for two hours. Thin-layer chromatography of 2  $\mu\text{l}$  sample-spots was executed on silica gel with n-butanol:acetic acid:water (3:1:1) as mobile phase. Carbohydrates on the chromatogram were detected by staining with the thymol-sulfuric acid reagent. Lane 1: tamarind xyloglucan only; Lanes 2, 3 and 4: incubation of tamarind xyloglucan with *C. reflexa* enzyme extract for zero, two and 24 hours at 25  $^{\circ}\text{C}$ , respectively; Lane 5: enzyme extract only; Lane 6: incubation of tamarind xyloglucan with a recombinant xyloglucanase (E-XEGP from Megazyme) at 25  $^{\circ}\text{C}$ . The four main xyloglucan oligosaccharide (XXXG, XXLG, XLXG and XLLG) hydrolysis products are marked with arrow tips.
